# Supplementary material for: Development and Psychometric Testing of Quality Nursing Care Scale in Public Hospital Settings in Mongolia
Source: Research Square preprint supplement (doi:10.21203/rs.3.rs-141618/v1), 2021-01-12
Supplement: Supplementary file 1 [file afa4f45d46cac74a21acb4fc.pdf]

**Table 1.** Demographic Characteristics of the Nurses (n=440)

| Demographic Characteristics                               | Frequency | Percentage (%) |
|-----------------------------------------------------------|-----------|----------------|
| Age (years) ( $\bar{X}$ = 36.36, SD=10.06, Range = 22-59) | 162       | 36.8           |
| 20-29                                                     | 97        | 22.0           |
| 30-39                                                     | 128       | 29.1           |
| 40-49                                                     | 53        | 12.0           |
| 50-59                                                     |           |                |
| Gender                                                    | 431       | 98.0           |
| Female                                                    | 9         | 2.0            |
| Male                                                      |           |                |
| Marital status                                            |           |                |
| Single                                                    | 98        | 22.3           |
| Married                                                   | 313       | 71.1           |
| Divorced                                                  | 11        | 2.5            |
| Widowed                                                   | 11        | 2.5            |
| Separated                                                 | 7         | 1.6            |
| Educational level                                         |           |                |
| Diploma                                                   | 163       | 37.0           |
| Bachelor                                                  | 262       | 59.5           |
| Master or above                                           | 15        | 3.4            |
| Work experience (years)                                   |           |                |
| 1-5                                                       | 165       | 37.5           |
| 6-10                                                      | 74        | 16.8           |
| 11-15                                                     | 50        | 11.4           |
| More than 15                                              | 151       | 34.3           |
| Work department                                           |           |                |
| Surgical nursing                                          | 75        | 17.0           |
| Medical nursing                                           | 365       | 83.0           |
| Hospital                                                  |           |                |
| State Central First Hospital                              | 145       | 33.0           |
| State Central Second Hospital                             | 60        | 13.6           |
| State Central Third Hospital                              | 119       | 27.0           |
| Khan Uul District General Hospital                        | 18        | 4.1            |
| Songinokhairkhan District General hospital                | 20        | 4.5            |
| Bayanzurkh District General Hospital                      | 21        | 4.8            |
| Chingeltei District Health Center                         | 19        | 4.3            |
| Bayangol District Health Center                           | 18        | 4.1            |
| Sukhbaatar District Health Center                         | 20        | 4.5            |

**Table 2.** Item descriptions, item-total correlations, Cronbach's alpha and factor loadings (n=440)

| Item No.                    | Description                                                                                                 | Corrected item-total correlation | Cronbach alpha | Factor loadings                   |     |     |    |    |    |
|-----------------------------|-------------------------------------------------------------------------------------------------------------|----------------------------------|----------------|-----------------------------------|-----|-----|----|----|----|
|                             |                                                                                                             |                                  |                | F1                                | F2  | F3  | F4 | F5 | F6 |
| Overall QNCS                |                                                                                                             |                                  | 0.92           | Total explained variance = 55.41% |     |     |    |    |    |
| Interdependent Nursing Role |                                                                                                             |                                  | 0.74           | Eigenvalue: 1.17; Variance:3.25   |     |     |    |    |    |
| 4                           | Interventions to relieve patients' physical suffering.                                                      | 0.41                             |                | .75                               |     |     |    |    |    |
| 6                           | Prompt care when I notice patients' clinical symptoms.                                                      | 0.35                             |                | .73                               |     |     |    |    |    |
| 2                           | Recognize clinical symptoms                                                                                 | 0.33                             |                | .69                               |     |     |    |    |    |
| 3                           | Priority is concern for relieving or reducing physical suffering.                                           | 0.37                             |                | .63                               |     |     |    |    |    |
| Independent Nursing Role    |                                                                                                             |                                  | 0.72           | Eigenvalue:1.63; Variance:4.53    |     |     |    |    |    |
| 12                          | Help patients to maintain their hygiene                                                                     | 0.38                             |                |                                   | .64 |     |    |    |    |
| 10                          | Determine whether or not my patients are getting enough sleep or rest                                       | 0.38                             |                |                                   | .63 |     |    |    |    |
| 9                           | Adequate daily exercise programs or physical activities                                                     | 0.41                             |                |                                   | .58 |     |    |    |    |
| 7                           | Adequate diet for all patients to regard individual needs for healing.                                      | 0.46                             |                |                                   | .53 |     |    |    |    |
| 8                           | Adequate care to solve the process of elimination problems                                                  | 0.47                             |                |                                   | .52 |     |    |    |    |
| Psychological element       |                                                                                                             |                                  | 0.83           | Eigenvalue:2.14; Variance: 5.96   |     |     |    |    |    |
| 16                          | encourage and allow time for patients to talk about their priority concerns.                                | 0.55                             |                |                                   |     | .70 |    |    |    |
| 13                          | spend enough time with patients to sincerely discuss their feelings.                                        | 0.50                             |                |                                   |     | .67 |    |    |    |
| 17                          | encourage patients' self-confidence to assist in maintaining their health and help manage their illnesses.  | 0.54                             |                |                                   |     | .64 |    |    |    |
| 15                          | encourage the patient to be resolute and determine to get better.                                           | 0.49                             |                |                                   |     | .58 |    |    |    |
| 14                          | say inspiring words to my patients. e.g., your treatment is working well; you're getting better day by day. | 0.51                             |                |                                   |     | .53 |    |    |    |
| 21                          | educate each patient specifically for individual needs.                                                     | 0.53                             |                |                                   |     |     |    |    |    |
| 22                          | give up-to-date and evidence-based health education for patients.                                           | 0.48                             |                |                                   |     | .51 |    |    |    |
|                             |                                                                                                             |                                  |                |                                   |     | .48 |    |    |    |

**Table 2.** Item descriptions, item-total correlations, Cronbach's alpha and factor loadings (n=440) (Continued)

| Item No.        | Description                                                                                                                      | Corrected item-total correlation | Cronbach alpha | Factor loadings                   |    |    |    |     |     |
|-----------------|----------------------------------------------------------------------------------------------------------------------------------|----------------------------------|----------------|-----------------------------------|----|----|----|-----|-----|
|                 |                                                                                                                                  |                                  |                | F1                                | F2 | F3 | F4 | F5  | F6  |
| Personal Milieu |                                                                                                                                  |                                  | 0.84           | Eigenvalue: 3.73; Variance: 10.36 |    |    |    |     |     |
| 30              | Available when patients call me or ring their bell.                                                                              | 0.43                             |                |                                   |    |    |    | .77 |     |
| 29              | Have ability to apologize to patients if i make mistakes.                                                                        | 0.39                             |                |                                   |    |    |    | .73 |     |
| 27              | Sincere listen to what my patients is telling me.                                                                                | 0.45                             |                |                                   |    |    |    | .73 |     |
| 28              | Patient and tolerant with my patients and their families.                                                                        | 0.53                             |                |                                   |    |    |    | .69 |     |
| 26              | Offer a personal greeting to patients that i encounter when i arrive at work.                                                    | 0.43                             |                |                                   |    |    |    | .65 |     |
| 36              | Allow my patients to do things that get them to calm down.                                                                       | 0.47                             |                |                                   |    |    |    | .63 |     |
| 34              | Softly touch my patients' shoulders or hands when appropriate.                                                                   | 0.58                             |                |                                   |    |    |    | .61 |     |
| 33              | Allow time to make an effort to cheer my patients up.                                                                            | 0.66                             |                |                                   |    |    |    | .58 |     |
| 38              | Make patients feel welcome on the ward                                                                                           | 0.52                             |                |                                   |    |    |    | .57 |     |
| Social Milieu   |                                                                                                                                  |                                  | 0.78           | Eigenvalue: 1.40; Variance: 3.89  |    |    |    |     |     |
| 46              | I maintain an environment that promotes healing e.g., quiet, clean and good ventilation.                                         | 0.56                             |                |                                   |    |    |    | .72 |     |
| 45              | I draw a curtain to separate patients from others when performing any physical care procedures.                                  | 0.39                             |                |                                   |    |    |    | .72 |     |
| 47              | I ensure the promotion of safety and security of all patients on the ward.                                                       | 0.49                             |                |                                   |    |    |    | .69 |     |
| 48              | I ensure a pleasant atmosphere all the time whenever possible.                                                                   | 0.53                             |                |                                   |    |    |    | .64 |     |
| Spiritual Force |                                                                                                                                  |                                  | 0.85           | Eigenvalue:9.86; Variance:27.40   |    |    |    |     |     |
| 52              | I'm not partial in regard to patients practice of traditional beliefs                                                            | 0.37                             |                |                                   |    |    |    |     | .80 |
| 51              | I maintain consideration for patients' beliefs                                                                                   | 0.49                             |                |                                   |    |    |    |     | .79 |
| 50              | I volunteer to help when patients and their families desire to perform religious activities in the unit                          | 0.51                             |                |                                   |    |    |    |     | .73 |
| 59              | I agree that all patients from different cultural backgrounds should be able to choose their own individually preferred benefits | 0.38                             |                |                                   |    |    |    |     | .67 |
| 49              | I provide the opportunity for religious activities in the unit.                                                                  | 0.47                             |                |                                   |    |    |    |     | .64 |
| 54              | I consider the patients' different health-related attributes and cultural needs when I develop nursing care plans.               | 0.54                             |                |                                   |    |    |    |     | .61 |
| 55              | I freely discuss with patients about any restrictions relating to their cultures                                                 | 0.58                             |                |                                   |    |    |    |     | .51 |

## Appendix A

Number of Study Participants Stratified by Participating Hospital

| Name of Hospital                       | Population | Sample |
|----------------------------------------|------------|--------|
| First State Central Hospital           | 210        | 154    |
| Second State Central Hospital          | 168        | 59     |
| Third State Central Hospital           | 294        | 138    |
| Khan Uul District Hospital             | 52         | 23     |
| Sukhbaatar District Health Center      | 51         | 22     |
| Songinokhaikhan District Health Center | 55         | 24     |
| Bayanzurkh District Hospital           | 55         | 24     |
| Bayangol District Health Center        | 49         | 20     |
| Chingeltei District Health Center      | 50         | 21     |
| Total                                  | 984        | 485    |

## Appendix B

The Final Version of QNCS-M was shortened from the 66 to 36 items.

| Dimensions         | Number of Items |                  |                        |                        |                     |                 | Final version |
|--------------------|-----------------|------------------|------------------------|------------------------|---------------------|-----------------|---------------|
|                    | Third draft     | Deleted by       |                        |                        |                     |                 |               |
|                    |                 | Content analysis | Item-total correlation | Inter-item correlation | Social Desirability | Factor analysis |               |
| Overall QNCS       | 66              | 7                | 3                      | 12                     | 6                   | 2               | 36            |
| Physical care      | 16              | 4                | 1                      | 1                      | 1                   | -               | 9             |
| Psychological care | 13              | -                | 1                      | 4                      | 1                   | -               | 7             |
| Emotional care     | 12              | -                | -                      | 1                      | 2                   | 1               | 8             |
| Social care        | 14              | 3                | 1                      | 4                      | -                   | 1               | 5             |
| Spiritual care     | 11              | -                | -                      | 2                      | 3                   | -               | 7             |
